# Supplementary material
Source: publisher site journal article supplement (https://static.cambridge.org/content/id/urn:cambridge.org:id:article:S104795112000164X/resource/name/S104795112000164Xsupp001.docx)
Supplement: Supplementary file 1 [file S104795112000164Xsupp001.docx]

| **Supplemental Table 1:** Description of Encounters with Multiple FINs | | | | | | |
| --- | --- | --- | --- | --- | --- | --- |
| Variable, n (row %) | **Overall: encounters with multiple FINs (n=66)** | **Encounters with Cardiovascular and Respiratory FINs (n=27)** | **Encounters with Cardiovascular and Sedation FINs (n=10)** | **Encounters with any other 2 FINs (n=26)** | **Encounters with 3 FINs (n=3)** |
| **Age Group at Admission** |  |  |  |  |  |
| Neonate (0-28 days) | 20 | 9 (45) | 1 (5) | 9 (45) | 1 (5) |
| Pediatric (≥29 days) | 46 | 18 (39) | 9 (20) | 17 (37) | 2 (4) |
| **Genetic Abnormality** | 20 | 10 (50) | 4 (20) | 5 (25) | 1 (5) |
| **Medical Admission** | 11 | 5 (45) | 0 (0) | 6 (55) | 0 (0) |
| **Benchmark Operation** |  |  |  |  |  |
| Aortic arch | 10 | 4 (40) | 0 (0) | 6 (60) | 0 (0) |
| ASO+-VSD | 3 | 2 (67) | 0 (0) | 1 (33) | 0 (0) |
| Atrial | 1 | 0 (0) | 1 (100) | 0 (0) | 0 (0) |
| AVC | 2 | 1 (50) | 0 (0) | 1 (50) | 0 (0) |
| Fontan | 1 | 1 (100) | 0 (0) | 0 (0) | 0 (0) |
| Glenn | 4 | 0 (0) | 3 (75) | 1 (25) | 0 (0) |
| Left-side valve | 4 | 2 (50) | 0 (0) | 2 (50) | 0 (0) |
| Norwood or BTS | 8 | 5 (63) | 1 (13) | 1 (13) | 1 (13) |
| Other | 4 | 0 (0) | 0 (0) | 3 (75) | 1 (25) |
| PVR/Conduit | 2 | 0 (0) | 0 (0) | 2 (100) | 0 (0) |
| TAPVC | 1 | 0 (0) | 1 (100) | 0 (0) | 0 (0) |
| TOF | 4 | 2 (50) | 1 (25) | 1 (25) | 0 (0) |
| Transplant | 1 | 1 (100) | 0 (0) | 0 (0) | 0 (0) |
| Truncus | 0 | 0 (0) | 0 (0) | 0 (0) | 0 (0) |
| Vascular ring | 3 | 2 (67) | 0 (0) | 1 (33) | 0 (0) |
| VSD | 7 | 2 (29) | 3 (43) | 1 (14) | 1 (14) |
| **ICU discharge Season** |  |  |  |  |  |
| Fall | 23 | 9 (39) | 4 (17) | 9 (39) | 1 (4) |
| Winter | 9 | 6 (67) | 1 (11) | 2 (22) | 0 (0) |
| Spring | 16 | 5 (31) | 4 (25) | 7 (44) | 0 (0) |
| Summer | 18 | 7 (39) | 1 (6) | 8 (44) | 2 (11) |
| **Short LOS (CICU LOS <7.9 days)** | 47 | 18 (38) | 9 (19) | 19 (40) | 1 (2) |
| **Survey Respondent (years of experience)** |  |  |  |  |  |
| Physician 1 (<5 years) | 11 | 6 (55) | 2 (18) | 3 (27) | 0 (0) |
| Physician 2 (<5 years) | 7 | 5 (71) | 0 (0) | 1 (14) | 1 (14) |
| Physician 3 (5-15 years) | 15 | 8 (53) | 1 (7) | 5 (33) | 1 (7) |
| Physician 4 (<5 years) | 10 | 0 (0) | 0 (0) | 9 (90) | 1 (10) |
| Physician 5 (>15 years) | 16 | 8 (50) | 6 (38) | 2 (12) | 0 (0) |
| Physician 6 (>15 years) | 0 | 0 (0) | 0 (0) | 0 (0) | 0 (0) |
| Physician 7 (>15 years) | 7 | 0 (0) | 1 (14) | 6 (86) | 0 (0) |
| Physician 8 (> 15 years) | 0 | 0 (0) | 0 (0) | 0 (0) | 0 (0) |
